# Supplementary material
Source: PubMed Central journal article supplement (PMC1326150)

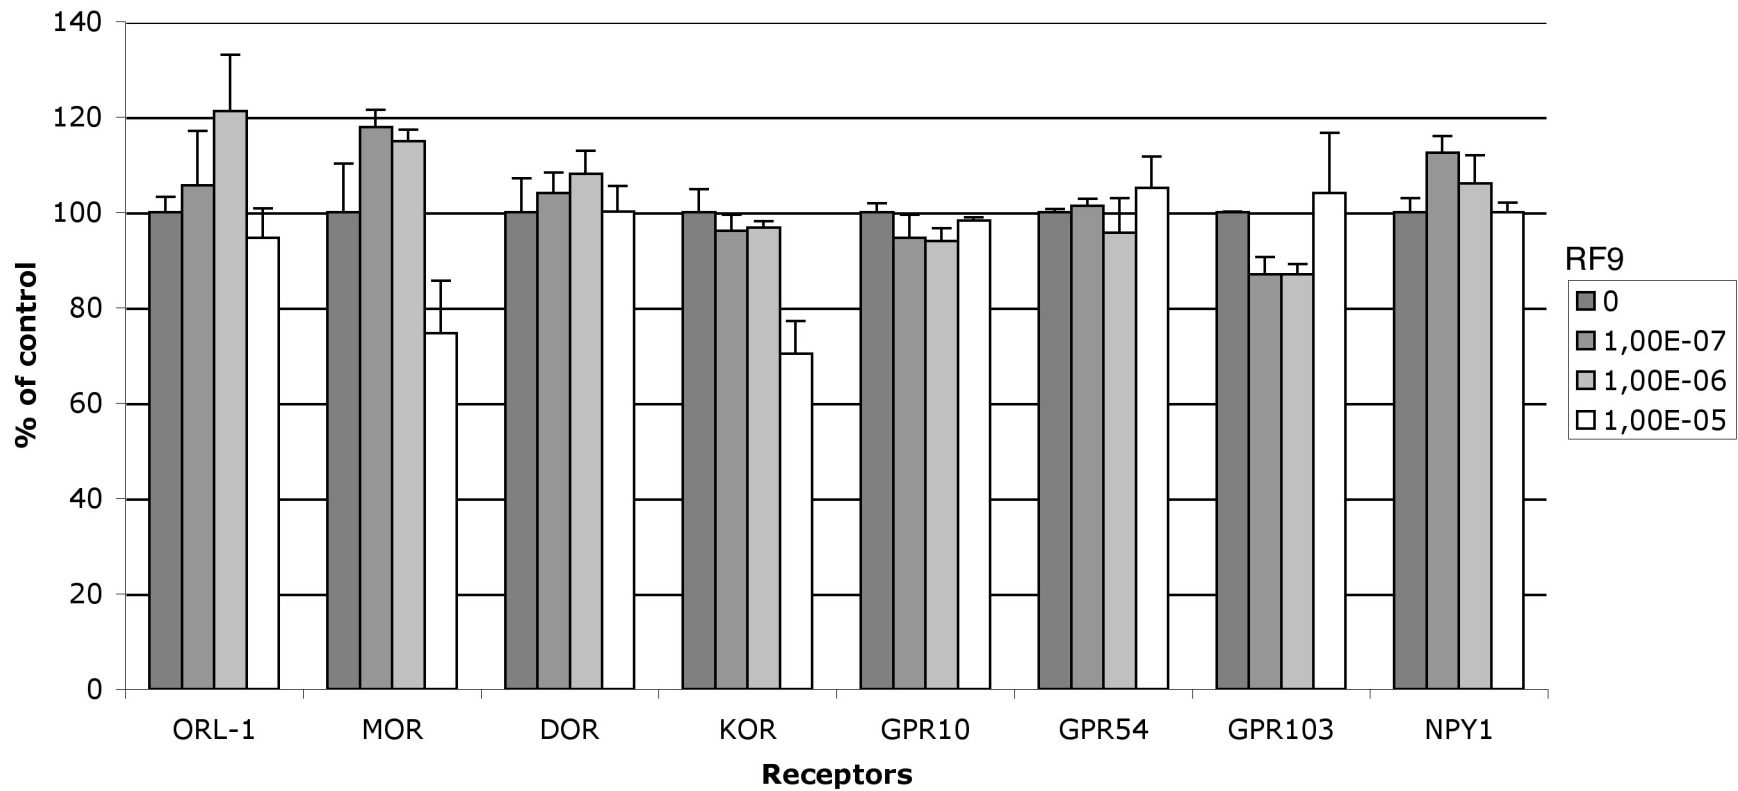

Supplement: pnas_0502090103_1.pdf [file pnas_0502090103_1.pdf]
